# Supplementary material for: Transcriptomic and Metabolic Profiling Reveals a Lignin Metabolism Network Involved in Mesocotyl Elongation during Maize Seed Germination
Source: MDPI journal article supplement (doi:10.3390/plants11081034), 2022-04-11
Supplement: s1 [file s1]

**Table S1.** Summary of quality preprocessing in N192 and Ji853 mesocotyls under 3 cm sowing depth (CK), 20 cm sowing depth (DSS),  $4.16 \times 10^{-3}$  M 24-epibrassinolide (EBR) induction at 20 cm sowing depth (DSS+EBR) conditions by RNA-sequencing (RNA-Seq) data.

| Sample         | Raw Data<br>Size (bp) | Clean Data<br>Size (bp) | Clean Data<br>Rate (%) | Total<br>Reads | Q20<br>percentage<br>(%) | Q30<br>percentage<br>(%) | GC<br>(%) | Mapped<br>Reads | Mapping<br>Rate (%) |
|----------------|-----------------------|-------------------------|------------------------|----------------|--------------------------|--------------------------|-----------|-----------------|---------------------|
| N192(CK)       | 8041438907            | 7453056733              | 92.68                  | 48818227       | 98.04                    | 93.18                    | 53.83     | 43377315        | 88.85               |
| N192(DSS)      | 8385320530            | 7484737105              | 89.26                  | 50458344       | 98.11                    | 94.02                    | 53.27     | 45568930        | 90.30               |
| N192(DSS+EBR)  | 8135207165            | 7951351483              | 97.74                  | 51659460       | 97.99                    | 94.65                    | 54.15     | 45444827        | 87.97               |
| Ji853(CK)      | 7945756549            | 7198855434              | 90.61                  | 49974282       | 98.09                    | 94.52                    | 53.98     | 44946869        | 89.94               |
| Ji853(DSS)     | 8402899726            | 7881919943              | 93.85                  | 53956450       | 98.14                    | 94.64                    | 54.36     | 48566200        | 90.01               |
| Ji853(DSS+EBR) | 8563313670            | 8272161005              | 96.59                  | 53691625       | 98.2                     | 94.27                    | 54.22     | 48462060        | 90.26               |
| Average        | 8245656091            | 7707013617              | 93.46                  | 51426398       | 98.10                    | 94.21                    | 53.97     | 46061033        | 89.56               |

**Table S2.** The quantitative real-time (qRT-PCR) primer sequence.

| Gene name | Gene ID               | Forward primer (5' to 3') | Reverse primer (5' to 3') | Chromosome | Gene Position (bp)   |
|-----------|-----------------------|---------------------------|---------------------------|------------|----------------------|
| Actin1    | <i>Zm00001d010159</i> | CGATTGAGCATGGCATTGTCA     | CCCACTAGCGTACAACGAA       | 8          | 102413768..102417536 |
| PAL       | <i>Zm00001d003015</i> | CTCATCCGATTCTCAATGC       | GTCACGTTGGTGTGAGCAG       | 2          | 29467845..29470586   |
| PAL       | <i>Zm00001d017276</i> | CCGAGTACCGCCAACCCT        | CCAGTCGCTGCTTGCCTT        | 5          | 191474509..191476978 |
| C4H       | <i>Zm00001d016471</i> | CAACTACGGCGACTTCATCC      | CGTTGATGTTCTCGACGATGT     | 5          | 163692318..163694217 |
| HCT       | <i>Zm00001d039947</i> | CGCATGCAGCCTGAAGAGAT      | AACGAGGTCACGCGAGAGA       | 3          | 20216146..20226938   |
| C3'H      | <i>Zm00001d043174</i> | GGGAAGCCGTTGGTTGTAA       | GGACGCACCGATCTTGATG       | 3          | 190625724..190628380 |
| CCoAOMT   | <i>Zm00001d005998</i> | GCAGCTCCTGATCGAGATTC      | GCGACCTATCTGGTCGTAG       | 2          | 194954891..194956278 |
| CCR       | <i>Zm00001d032152</i> | GCTGCTCGAGAAGGATACAC      | CGGGTCATCTGCTGCCAT        | 1          | 214573400..214579274 |
| CAD       | <i>Zm00001d002346</i> | TGCAGATCTCTGCCTTCTCTTT    | GCGTTCCATGGCCTCATT        | 2          | 10649171..10653306   |
| POD       | <i>Zm00001d009138</i> | AAGCGCGTGAAGACCAA         | TGCCGTGTGAAGCTGAAATAA     | 8          | 38826820..38828682   |
| POD       | <i>Zm00001d053554</i> | GCCCTCTTCGCTCAGACTT       | TCAGCTGCTGTTGACCACCC      | 4          | 233852931..233854306 |
| MYB       | <i>Zm00001d014029</i> | AACTACCTCCACCCGACAT       | GTGCACACGTTCTTGATCTC      | 5          | 29347095..29349160   |
| MYB       | <i>Zm00001d040621</i> | GGCTGAGGCTGGTTTTGCT       | GTTTCGACCGGGAAGTGA        | 3          | 54361983..54365788   |
| MYB       | <i>Zm00001d008808</i> | TAGGAAGTGCTCTAGCTGTGGG    | TGAAGCACCTCTTCATGGCTA     | 8          | 21238420..21240608   |
| MYB       | <i>Zm00001d009435</i> | GGGGAACAGGTGGTCGCA        | GCGGCTTGCTCTGGTCGT        | 8          | 64426126..64427468   |
| MYB       | <i>Zm00001d038288</i> | GCTGTTTTCTGGAGGGGCTT      | GTCGTGGATGCTCTTGCG        | 6          | 153438814..153440041 |
| MYB       | <i>Zm00001d044117</i> | AGTGGACGGCAAGCAGAA        | GTAGCGCTGACCTCGTCCGCC     | 3          | 219796585..219798521 |
| NAC       | <i>Zm00001d003626</i> | TGTTTTGTGCTGACGAGACGG     | CGTCGAATCAAACACTCGGCATATC | 2          | 50875214..50876868   |
| NAC       | <i>Zm00001d006053</i> | GCTTCAGGTTCCACCCGACT      | CGTTCGCACGCCTGTTGGGTA     | 2          | 196582113..196584517 |
| NAC       | <i>Zm00001d020982</i> | TGGTGGTGGAGGGGGAAGTCG     | GACCGGTGAAGATTTCTTTATC    | 7          | 138832013..138836335 |
| NAC       | <i>Zm00001d022517</i> | CGCTGGACAGCCGCTTCTCCTG    | CTGCTACTGCCGCGGAAGAT      | 7          | 179273894..179275680 |
| WRKY      | <i>Zm00001d008794</i> | GGAGGAACAAGAACAACGCA      | CGAGGTCGTCGGGGTCGTCGGT    | 8          | 20545292..20547558   |
| WRKY      | <i>Zm00001d012505</i> | ACGAGATCGCCTACTACGGG      | TCCAGGAACCTCATTACCGGATCAG | 8          | 175577029..175578804 |
| PEX14     | <i>Zm00001d011119</i> | GCAGGTCAACAGCCAGAATCA     | AGCACAAAACCAAGCAAGA       | 8          | 39412827..139416787  |
| PXMP2     | <i>Zm00001d052410</i> | CCATTTTCATTGGCGTCTTTA     | CAAGGGGTACAAAATTAGCACC    | 4          | 189313573..189318465 |
| MPV17     | <i>Zm00001d011761</i> | CGGCTATGGGTGATTCTTTT      | GGTTTCATTTGCTCATTGTGGT    | 8          | 160949609..160951534 |
| ACOX      | <i>Zm00001d045606</i> | GTCATCCACAGTCCAACCTCTCAC  | CACTACCGAATTTCCACCAAT     | 9          | 28565344..28570133   |
| ACAA1     | <i>Zm00001d049882</i> | AGGCAAGAGCAAGATCAGACC     | ATCCACTCCAACAGCGGCA       | 4          | 50211783..50214016   |
| CAT       | <i>Zm00001d027511</i> | CGCACACCACAACAACCACT      | ACCGCTCTTGCTTGGCTG        | 1          | 7144389..7146665     |
| SOD       | <i>Zm00001d031908</i> | GCATAGCCGAGGCAACCAT       | CCCCCTTTCCCAAATCAT        | 1          | 206405747..206408926 |
| MVK       | <i>Zm00001d054008</i> | CTCCGCCTTCCTTTTCTCT       | CAACACCTCCCAACCTCA        | 4          | 245047670..245055426 |

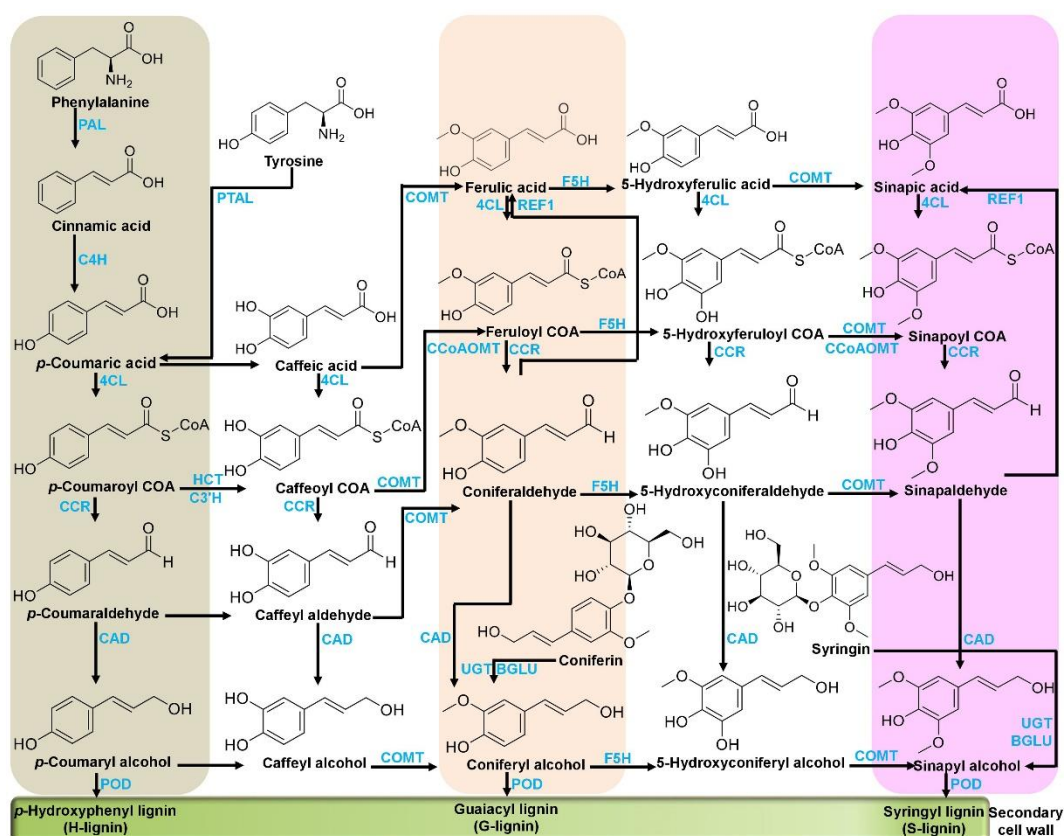

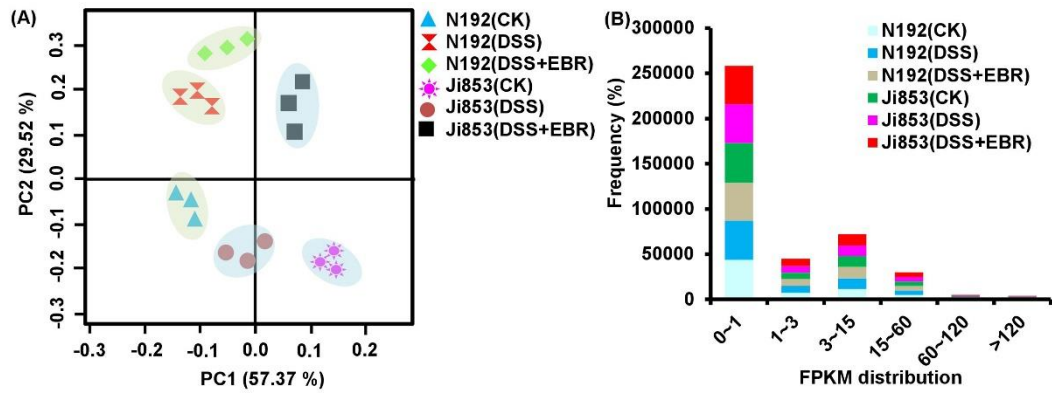

**Figure S2.** The principal component analysis (PCA) (A) and FPKM values distribution of corresponding genes (B) in N192 and Ji853 mesocotyls under 3 cm sowing depth (CK), 20 cm sowing depth (DSS),  $4.16 \times 10^{-3}$  M 24-epibrassinolide (EBR) induction at 20 cm sowing depth (DSS+EBR) conditions by RNA-sequencing (RNA-Seq) data.

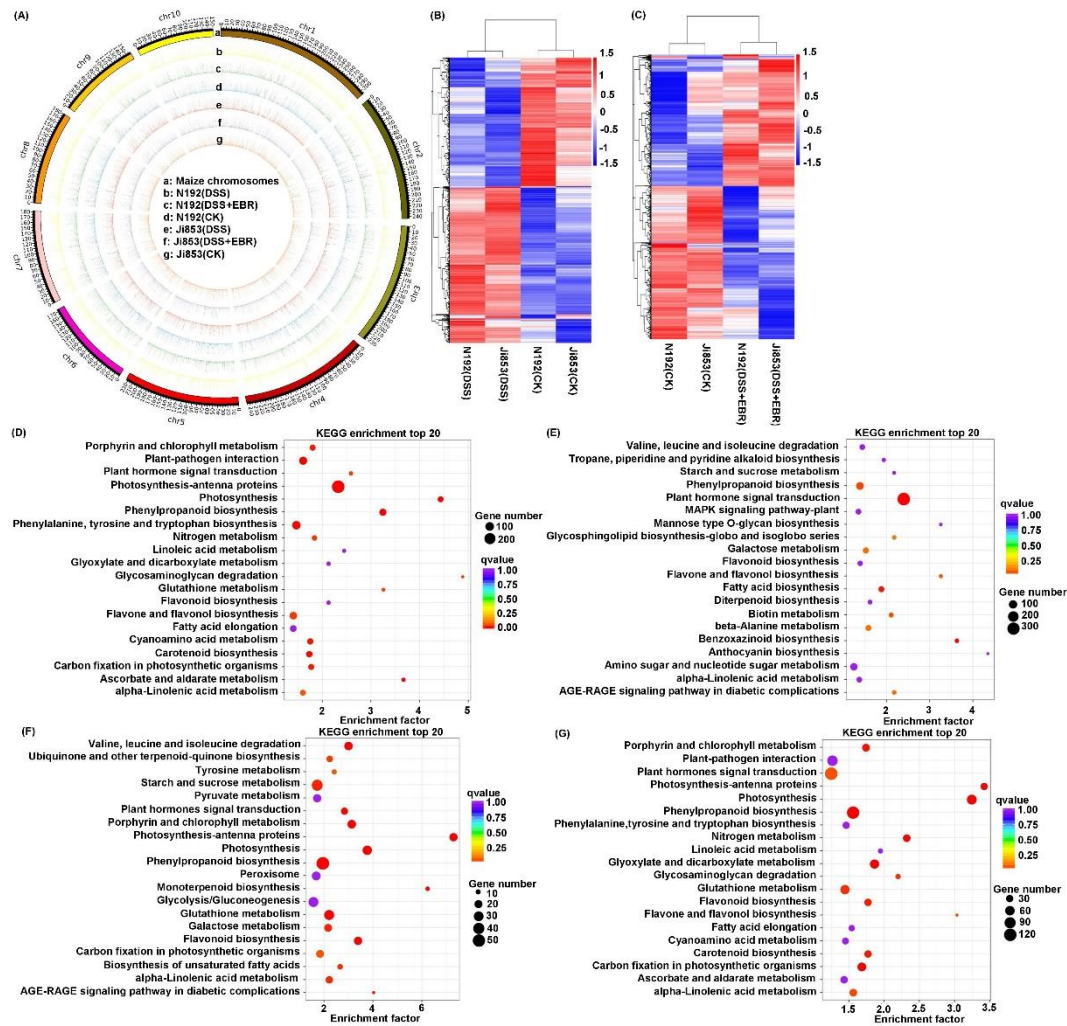

**Figure S3.** Distribution and expression profiles of differentially expressed genes (DEGs) and top 20 KEGG enrichment analysis in N192 and Ji853 mesocotyls under CK, DSS, and DSS+EBR conditions. Distribution of DEGs in N192 and Ji853 mesocotyl under three conditions (A). Based on the log2 fold-change value of different comparisons, DEGs hierarchical clustering performed for three conditions to obtain six clusters (B and C). Top 20 KEGG pathways enriched by DEGs in N192 and Ji853 mesocotyls under DSS conditions, respectively (D and E), and which under DSS+EBR conditions, respectively (F and G), respectively.

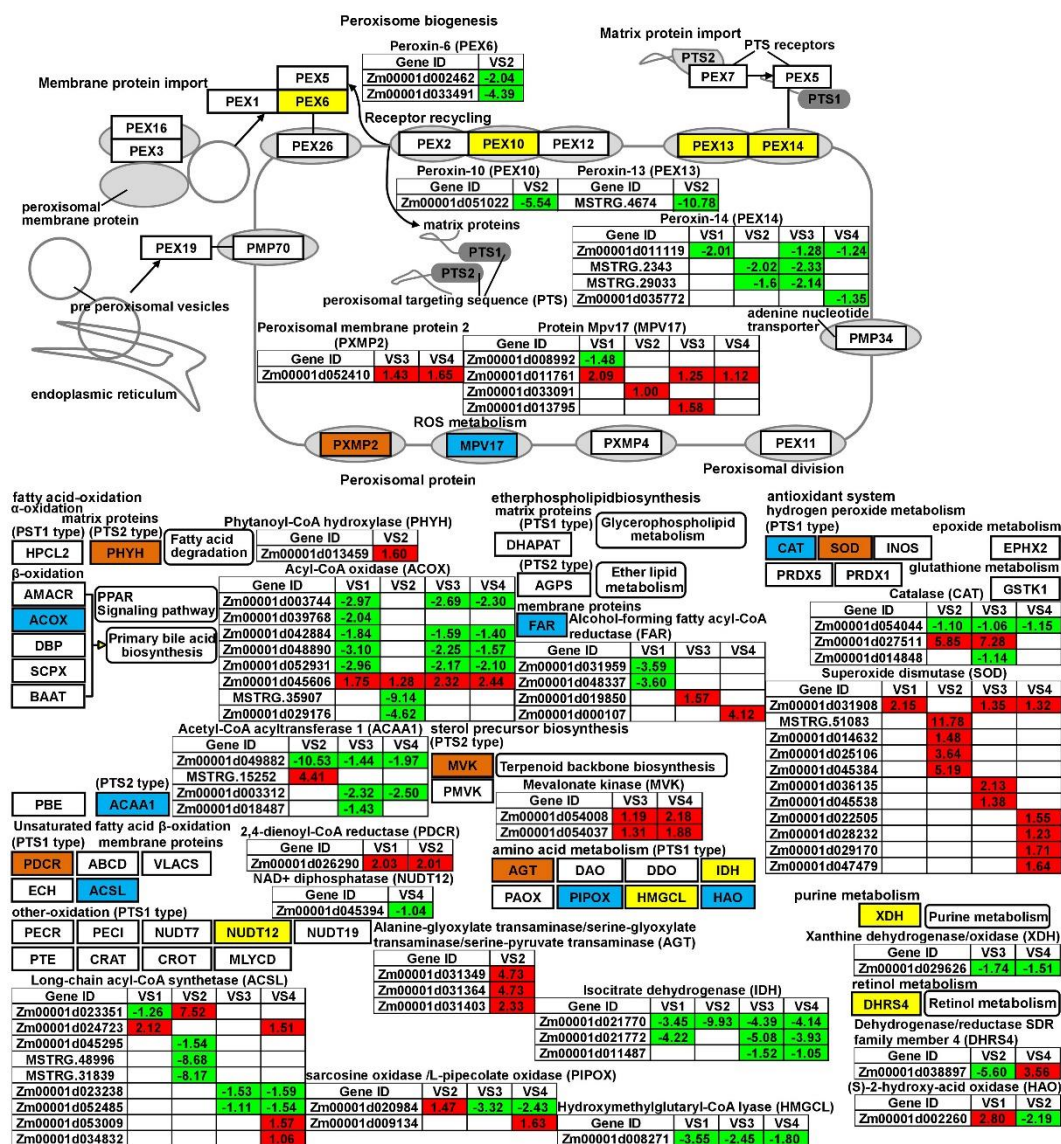



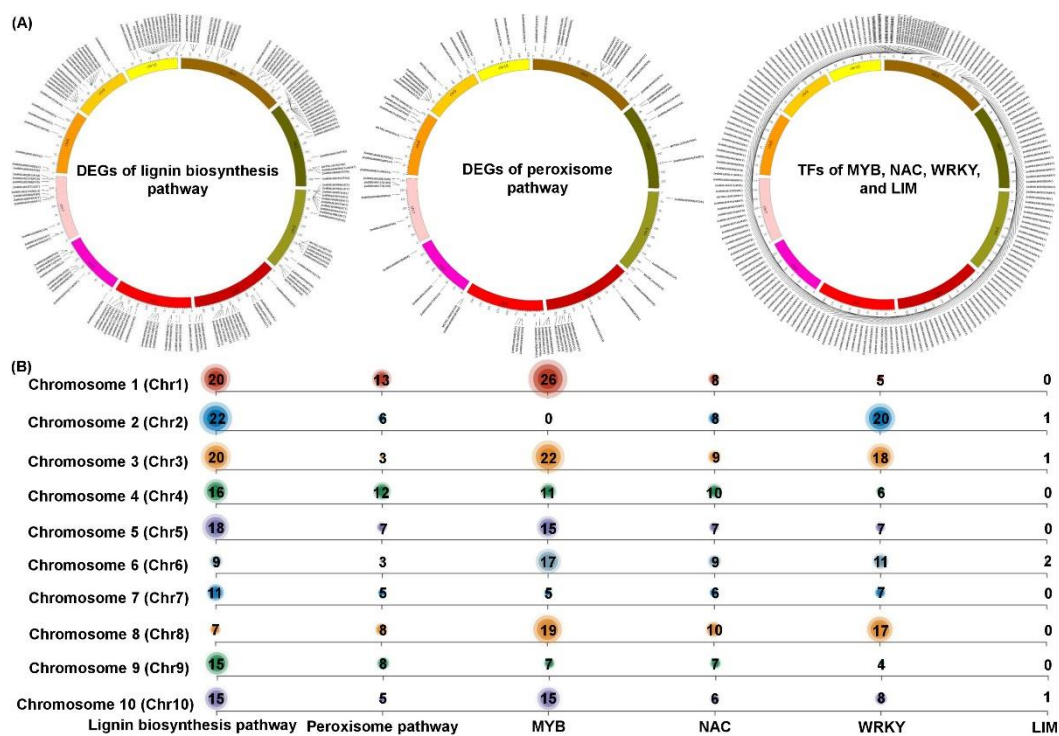

**Figure S5.** Genomic distributions of corresponding identified DEGs/transcription factors (TFs) on ten maize chromosomes. DEGs of lignin biosynthesis pathway, peroxisome pathway, and TFs including MYB, NAC, WRKY, and LIM distributions map (A). Bubble diagram of number for detected DEGs on each maize chromosome (B).

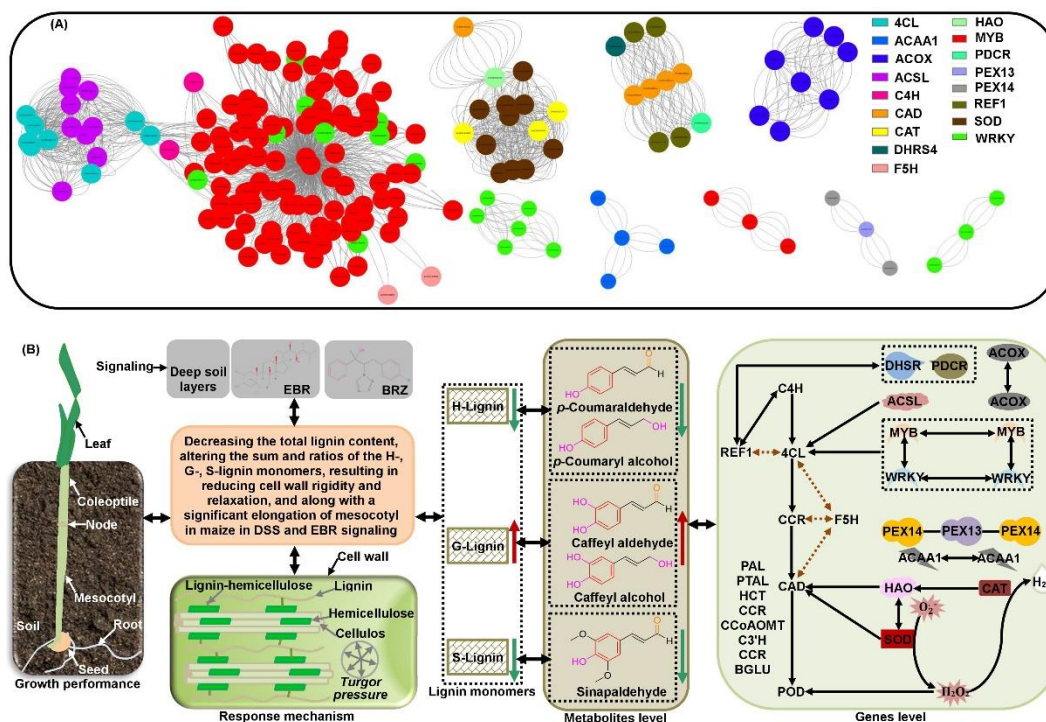

**Figure S6.** Interaction networks of detected DEGs and molecular network underlying the DSS and EBR signaling response of maize mesocotyl elongation. Detected DEGs of lignin biosynthesis pathway, peroxisome pathway, and corresponding TFs interactome network mapping in maize mesocotyl in DSS and EBR signaling (A). The schematic molecular model of maize mesocotyl elongation in DSS and EBR signaling (B).
